1 Recent Y chromosome divergence despite ancient origin of dioecy in poplars (*Populus*)

2

3 Armando Geraldés<sup>a#</sup>, Charles A. Hefer<sup>a#</sup>, Arnaud Capron<sup>a</sup>, Natalia Kolosova<sup>a</sup>, Felix

4 Martínez-Nuñez<sup>a</sup>, Raju Y. Soolanayakanahally<sup>b</sup>, Brian Stanton<sup>c</sup>, Robert D. Guy<sup>d</sup>, Shawn

5 D. Mansfield<sup>e</sup>, Carl J. Douglas<sup>a</sup> and Quentin C. B. Cronk<sup>a</sup>

6 <sup>#</sup>Equal contribution

7 Departments of <sup>a</sup>Botany, <sup>d</sup>Forest and Conservation Sciences and <sup>e</sup>Wood Science,

8 University of British Columbia, Vancouver, BC V6T 1Z4, Canada

9 <sup>b</sup>Agroforestry Development Centre, Agriculture and Agri-Food Canada, Indian Head, SK

10 S0G 2K0, Canada

11 <sup>c</sup>Greenwood Resources, Portland, OR 97201, USA

12

13 Corresponding author: Armando Geraldés

14 6270 University Boulevard – Botany Department, UBC

15 Vancouver, BC V6T 1Z4 Canada

16 email: geraldés\_at\_mail\_dot\_ubc\_dot\_ca

17

18 Keywords: GWAS, SNP, XY-sex-determining-system, gender, methylation

19

20 Supplementary information: All supplementary files will be made available upon request.

21 Data Accessibility: All sequence data will be deposited on Genbank and SRA and all

22 other data files on Dryad.

23

24 **Abstract**

25 All species of the genus *Populus* (poplar, aspen) are dioecious, suggesting an  
26 ancient origin of this trait. Theory suggests that non-recombining sex-linked regions  
27 should quickly spread, eventually becoming heteromorphic chromosomes. In contrast, we  
28 show using whole genome scans that the sex-associated region in *P. trichocarpa* is small  
29 and much younger than the age of the genus. This indicates that sex-determination is  
30 highly labile in poplar, consistent with recent evidence of "turnover" of sex determination  
31 regions in animals. We performed whole genome resequencing of 52 *Populus*  
32 *trichocarpa* (black cottonwood) and 34 *P. balsamifera* (balsam poplar) individuals of  
33 known sex. Genome-wide association studies (GWAS) in these unstructured populations  
34 identified 650 SNPs significantly associated with sex. We estimate the size of the sex-  
35 linked region to be ~100 Kbp. All significant SNPs were in strong linkage disequilibrium  
36 despite the fact that they were mapped to six different chromosomes (plus 3 unmapped  
37 scaffolds) in version 2.2 of the reference genome. We show that this is likely due to  
38 genome misassembly. The segregation pattern of sex associated SNPs revealed this to be  
39 an XY sex determining system. Estimated divergence times of X and Y haplotype  
40 sequences (6-7 MYA) are much more recent than the divergence of *P. trichocarpa*  
41 (poplar) and *P. tremuloides* (aspen). Consistent with this, in *P. tremuloides* we found no  
42 XY haplotype divergence within the *P. trichocarpa* sex-determining region. These two  
43 species therefore have a different genomic architecture of sex, suggestive of at least one  
44 turnover event in the recent past.

45

46           **Introduction**

47           The separation of male and female sexual function into different individuals  
48 (dioecy) is an efficient way to ensure that sexual reproduction results in the  
49 recombination of genetic information from different individuals and is common in  
50 eukaryotes, occurring in 94% of animals [1] but only in about 6% of flowering plant  
51 species [1, 2]. Dioecy usually evolves from a cosexual ancestral state and involves at  
52 least two mutations. In one model, the pathway to XY systems involves one recessive  
53 mutation that suppresses male function ( $M^F \rightarrow M^s$ ) and a dominant mutation that  
54 suppresses female function ( $F^f \rightarrow F^S$ ) [3], where the Y chromosome harbors the alleles  
55  $M^F$  and  $F^S$  and the X chromosome the alleles  $M^s$  and  $F^f$ . Recombination suppression  
56 between these loci on the Y chromosome likely evolves under the action of natural  
57 selection because recombination generates unfit sterile individuals [4]. With time,  
58 recombination suppression may extend to the rest of the chromosome via the  
59 accumulation of sexually antagonistic mutations on the Y [5], leading to the degeneration  
60 of the heterogametic sex chromosome (the Y or the W) via Muller's ratchet, background  
61 selection and hitchhiking [6]. Under this view, old sex chromosomes are structurally and  
62 genetically divergent. The mammalian Y chromosome, having evolved ~170 MYA [7],  
63 is one such case of a degenerate Y chromosome that retains only a small fraction of the  
64 genes thought to be present in the autosomal pair from which the Y arose [8].

65           Studying old and degenerate Y chromosomes allows only for retrospective  
66 insights into their evolutionary origins. In some groups, sex chromosomes may be young  
67 and therefore provide windows into the initial stages of their evolution (e.g., [9, 10]). In  
68 plants, dioecy evolved independently in several clades allowing for a comparative

69 approach that may reveal commonalities and peculiarities among independent origins of  
70 sex chromosomes [11]. Despite recent progress in the use of genomic resources to  
71 unravel the genetic basis of dioecy in plants such as papaya and white campion, the  
72 nature of sex-determining regions and sex-determining genes in plants remains elusive  
73 [12].

74 *Populus* species (poplars, cottonwoods and aspens) present an excellent  
75 opportunity to study the evolution of sex chromosomes. *Populus* and *Salix*, sister genera  
76 in the Salicaceae, are composed exclusively of dioecious species (with reports of rare  
77 cosexual genotypes, e.g. [13]), consistent with a single ancient origin of dioecy in this  
78 group around 65 MYA [14]. The cytological evidence (reviewed in [15]) for the  
79 existence of heteromorphic sex chromosomes is mixed, but in general there is no strong  
80 evidence for their existence (or for different chromosome counts in males and females),  
81 and the nature of the sex-determining region in *Populus* has remained elusive. Previous  
82 genetic mapping studies have mapped the sex-determining region to the proximal  
83 telomeric end of chromosome 19 in poplars and cottonwoods (*Populus* sections  
84 Tacamahaca and Aigeiros, [16, 17]) or to a pericentromeric region in aspens (*Populus*  
85 section *Populus*, [18-20]). Some studies have proposed that females are the  
86 heterogametic sex (ZW system, [16, 19]) while other evidence suggests that males are  
87 (XY system, [17, 18, 20-22]). Recently, markers associated with sex were described for  
88 aspens, corresponding to the presence of the gene *TOZI9* on the Y chromosome of *P.*  
89 *tremula* and *P. tremuloides* and its absence from the X chromosome [22]. Here we use a  
90 genome-wide association approach (GWAS) to determine the genomic architecture of sex  
91 in two species of poplar.

92

## 93 **Results**

### 94 Genome-wide association analysis (GWAS)

95         We performed a simple case control GWAS between allele frequency at  
96 3,656,736 loci with MAF>0.1 (minor allele frequency) and GR>0.9 (genotyping rate,  
97 Table S1) and sex (male vs. female) of 34 female and 18 male *P. trichocarpa* individuals  
98 (hereafter T52 association population, SI). After Bonferroni correction we recovered 623  
99 single nucleotide polymorphisms (SNPs) significantly associated with sex ( $\alpha<0.05$ ; Fig. 1  
100 and Table S2). Across all significant SNPs and accessions, females were homozygous at  
101 99.9% of the genotypes and males were heterozygous at 94.0% of the genotypes, a  
102 pattern consistent with an XY sex determining system (Table 1).

103         A similar analysis for 1,140,437 SNPs (Table S1) and sex (18 female and 16 male  
104 individuals, SI) in *P. balsamifera* (hereafter B34) recovered no SNPs statistically  
105 associated with sex (Fig. 1 and Table S2). Inspection of the results of the two analyses  
106 revealed that for 72.6% (452/623) of the significantly associated SNPs in *P. trichocarpa*,  
107 no data was available in *P. balsamifera* (i.e. SNPs had GR<0.9 and/or MAF<0.1). For the  
108 remaining SNPs, the vast majority (157/171) showed a similar pattern to that of SNPs  
109 significantly associated with sex in *P. trichocarpa*, i.e. females were homozygous and  
110 males heterozygous (with less than 10% of accessions deviating from this pattern) and  
111 the observed uncorrected p-values range was  $2.07 \times 10^{-4}$ - $1.22 \times 10^{-6}$  (Fig. 1 and Table S2).

112         Finally, we created a third association population consisting of 36 females and 32  
113 males where, in each sex, equal numbers of accessions were *P. trichocarpa* and *P.*  
114 *balsamifera* (hereafter BT68, SI). In this population there were 1,782,995 SNPs with

115 MAF>0.1 and GR>0.9 (Table S1) and 303 SNPs were significantly associated with sex  
116 ( $\alpha<0.05$ ; Fig. 1 and Table S2), of which only 27 were not significant in the analysis with  
117 *P. trichocarpa* alone (T52, Table S2). Across all significant SNPs and accessions in  
118 BT68, females were homozygous at 99.6% of the genotypes and males were  
119 heterozygous at 94.1% of the genotypes, a pattern again consistent with an XY sex  
120 determining system (Table 1).

121 In all three cases, Q-Q plots (Fig. S1) did not reveal an inflation of observed p-  
122 values with regards to the expected distribution of p-values, except for the extreme  
123 observed p-values. This is as expected given that T52 and B34 are unstructured  
124 populations and the population structure observed in BT68 did not co-vary with the  
125 phenotype (SI).

126

#### 127 Genomic distribution of sex-associated SNPs

128 Surprisingly, SNPs significantly associated with sex were located in 10 different  
129 regions of v2.2 of the *P. trichocarpa* reference genome assembly. The majority of SNPs  
130 associated with sex in T52 were located in the proximal end of chromosome 19 (hereafter  
131 Chr19P, 62.12%, 387/623) and the distal end of the same chromosome (hereafter  
132 Chr19D, 14.60%, 91/623). Remaining SNPs were located on chromosomes 1, 4, 5, 8, 9  
133 and scaffolds 261, 1817 and 2325 (Fig. 1 and Table 2). Despite being distributed across  
134 different genomic regions, pairwise estimates of linkage disequilibrium between SNPs  
135 associated with sex were very high (all significant SNPs, average  $r^2=0.93$ , range 0.46-1;  
136 significant SNPs in putatively different genomic regions, average  $r^2=0.90$ , range 0.46-1;  
137 significant SNPs in the same genomic region, average  $r^2=0.97$ , range 0.51-1; Fig. S2).

138

139 Evidence for a single sex-specific locus in *P. trichocarpa*

140 Previous QTL experiments in *Populus* mapped sex to a single location suggesting  
141 inheritance as a single genetic locus [15]. Furthermore, sex always mapped to  
142 chromosome 19, albeit to different positions on the chromosome in different  
143 crosses/species [15]. Thus, the presence of SNPs associated with sex in different  
144 genomic regions in our GWAS might be due to problems with the assembly of the  
145 reference genome v2.2. To address this we repeated the GWAS for the T52 population  
146 after read mapping and SNP calling to genome assemblies v1.0 and v3.0. In both cases,  
147 sex again mapped to multiple regions although the details of the locations differed among  
148 assemblies (Fig. S3 and Tables S3-S4). The sex-determining region was therefore highly  
149 unstable with respect to assembly version.

150 We also performed cross mapping of sex-linked regions among assemblies with a  
151 BlastN (E-value cutoff  $10^{-10}$ , best 10 hits kept) search of the regions containing  
152 significant SNPs in v2.2 against assemblies v1.0 and v3.0 (Table S5). The resulting  
153 alignments indicated that the Chr09 and Chr19D sex-linked regions have similar  
154 locations in all three assemblies. All other sex-linked regions mapped to a different  
155 location in at least one of the three assemblies, e.g., the sex-linked region in Chr19P (v2.2  
156 and v1.0) has moved to the distal end of Chr18 in v3.0.

157 Finally, we queried (BlastN, E-value cut-off  $10^{-6}$ , best hit kept) the BAC end  
158 sequences of a male *P. trichocarpa* library [23] to look for BAC clones nearby our  
159 sex-linked regions in which the two ends mapped to different locations in v2.2 and  
160 we identified 17 such BACs (SI). For three of these BACs, both ends were sex-linked.

161 One BAC-end sequence from clone POR18-C06 maps to Chr19D and the other end  
162 maps to Chr01. One BAC-end sequence from clone POR02-A02 maps to Chr19P and  
163 the other end maps to scaffold 2325. Finally, one BAC-end sequence from clone  
164 POR07-E07 maps to Chr19P and the other end maps to Chr08. These results suggest  
165 that in this male, the sex-linked regions in Chr19D and Chr01, as well as in Chr08,  
166 Chr19P and scaffold 2325 are physically linked.

167 The above evidence, taken together, strongly suggests that assembly problems are  
168 sufficient to explain the genomic distribution of the sex-associated markers.

169

#### 170 Sex-linked regions in other accessions and species

171 We developed two PCR-RFLP assays for rapid genotyping of accessions in two  
172 of the regions with SNPs significantly associated with sex (Chr09 and Chr19P).  
173 Application of these assays to 8 samples of each sex and species used in the GWAS  
174 revealed full agreement between WGS and PCR-RFLP inferred genotypes (Fig. S4) and  
175 confirmed that one male of each species, BELA18-5 and AP2446, appears to be  
176 recombinant; i.e. both of these males are homozygous for the majority of SNPs in  
177 Chr19P, but are heterozygous for significant SNPs in the other sex-linked regions (Fig.  
178 S2). Application of these assays to *P. trichocarpa* and *P. balsamifera* accessions of each  
179 sex that were not used in the GWAS showed that these SNPs are linked with sex in  
180 independent accessions (Fig. S4). Finally, we used these assays to determine whether  
181 these SNPs are also linked to sex in other species. All 16 *P. deltooides* and 16 *P. nigra*  
182 accessions of known sex assayed were homozygous (XX) in females and heterozygous  
183 (XY) in males (Fig. S4). This indicates that the *P. trichocarpa/P. balsamifera* sex-linked



184 markers are conserved in these species. However, for one female and three male *P.*  
185 *tremuloides* accessions no differences between sexes were observed (Fig. S4), suggesting  
186 that in aspens these regions are not sex-linked.

187

### 188 Phylogeny of X and Y alleles

189 We performed allele-specific amplification and sequencing of X and Y alleles in  
190 two regions associated with sex (gene POPTR\_0019s00240 on Chr19P and gene  
191 POPTR\_0009s08410 on Chr09) using several males from each of four species: *P.*  
192 *trichocarpa*, *P. balsamifera*, *P. deltoides* and *P. nigra* (hereafter referred to as  
193 “cottonwoods”). We also included sequences cloned from *P. tremuloides* (hereafter  
194 referred to as “aspen”), the reference genome sequence, as well as the genome sequence  
195 of the paralog of each gene that resulted from the Salicoid whole genome duplication  
196 (WGD) event [24]. Maximum likelihood phylogenies of each region (Fig. 2 and Fig. S5)  
197 show that both X and Y chromosome alleles from all four cottonwood species group by  
198 gametolog (i.e., X or Y) and not by species, indicating that X and Y chromosome alleles  
199 began to diverge before species did. Note that because for one of the amplicons in  
200 Chr19P we failed to amplify the X gametolog of *P. nigra*, *P. nigra* alleles are not shown  
201 in the concatenated phylogeny of Chr19P (Fig. 2); nevertheless phylogenies of the other  
202 two amplicons in Chr19P show unequivocally that *P. nigra* alleles cluster by gametolog  
203 (Fig. S5). The placement of aspen alleles with respect to X and Y alleles from  
204 cottonwoods is uncertain. For the region in Chr09, they cluster with cottonwood  
205 sequences from the X gametolog, but with low bootstrap support, while for the region in  
206 Chr19P they appear basal to the X and Y clades (Fig. 2).

207

208 Divergence at X and Y regions

209       The phylogenies in Fig. 2 clearly suggest that recombination between the X and Y  
210 regions identified here ceased, and their divergence in cottonwoods started, after the split  
211 between cottonwoods and aspens. The amount of divergence at silent sites ( $K_s$ ), between  
212 the X and Y clade (Chr09  $K_s=0.0224$  and Chr19P  $K_s=0.0163$ ) was only slightly lower  
213 than  $K_s$  between all XY cottonwood alleles and aspen (Chr09  $K_s=0.0638$  and Chr19P  
214  $K_s=0.0186$ ), and both were roughly one tenth the  $K_s$  between the XY clade and the  
215 paralog from the Salicoid WGD (Chr09  $K_s=0.2027$  and Chr19P  $K_s=0.1774$ ; Table 3).  
216 Assuming the timing of the WGD to be 65 MYA [24], then XY divergence for Chr9  
217 would be approx. 7.2 MYA and Chr19 divergence approx. 6.0 MYA.

218       For both regions, the ratio of non-synonymous substitutions per non-synonymous  
219 site to synonymous substitutions per synonymous site ( $K_a/K_s$ ) is higher for the Y lineage  
220 than for the X lineage (Table 3). This pattern is consistent with an accumulation of  
221 deleterious mutations following recombination suppression. The fact that this difference  
222 is larger when divergence is measured to aspen (Chr09 X  $K_a/K_s=0.560$ , Y  $K_a/K_s=0.870$   
223 and Chr19P X  $K_a/K_s=0.247$  and Y  $K_a/K_s=0.463$ ), than when divergence is measured to  
224 the Salicoid paralog (Chr09 X  $K_a/K_s=0.582$ , Y  $K_a/K_s=0.737$  and Chr19P X  $K_a/K_s=0.188$   
225 and Y  $K_a/K_s=0.208$ ), suggests that the increase in  $K_a/K_s$  in the Y lineage is recent.  
226 Furthermore, despite its recent origin our data suggest that the Y-haplotype is already  
227 becoming non-functional as we observe frame-shift insertions/deletions in Y sequences  
228 of POPTR\_0009s08410.

229

230 Size and composition of the sex-linked region.

231           The 650 sex-associated SNPs, if concatenated, cover a total genomic region of  
232 ~100 Kbp. Thus given the evidence above that a single region is involved, that region is  
233 extremely small. We considered if there might be large missing tracts of Y sequence that  
234 were not detected by our read-mapping protocol. *De novo* assembly of unmapped reads  
235 from male accessions revealed four male-specific contigs that are candidates for such Y  
236 sequences (SI). However these are short (longest contig is 2514 bp) and BlastN searches  
237 reveal that they either are repetitive in nature or have significant similarity to the sex-  
238 linked regions identified by GWAS. There is thus no present evidence that the sex-locus  
239 in *P. trichocarpa* is significantly larger than reported here. The 13 genes in the sex-linked  
240 region (Table 2) cover a range of functional classes, including DNA methylation,  
241 hormone regulation, ion transport and plant defense.

242

243 **Discussion**

244 XY sex-determining system

245           The identification of 650 sex-specific SNPs heterozygous in males and  
246 homozygous in females by GWAS unequivocally shows that an XY system is involved in  
247 sex-determination in *P. trichocarpa*/*P. balsamifera*. The findings were fully and  
248 independently supported by PCR/RFLP-assays for two representative SNPs that  
249 distinguish X and Y alleles carried out on *P. trichocarpa*, *P. balsamifera*, *P. deltoides*,  
250 and *P. nigra* individuals of known sex not included in the GWAS. This finding of an XY  
251 system in cottonwoods (*Populus* sections *Tacamahaca* and *Aigeiros*) is further supported  
252 by previous reports of an XY system in *P. nigra* of section *Aigeiros* [17] and aspens of

253 section *Populus* [20-22] but is at odds with previous suggestions that a ZW (female  
254 heterogamy) system of sex determination may function in *P. trichocarpa* [16].

255 The previous suggestion that *P. trichocarpa* has a ZW system was based on  
256 inferences from a cross of *P. deltoides* x (*P. nigra* x *P. deltoides*) and was not supported  
257 by sex-specific markers [16]. Our results run counter to those inferences, but it is  
258 conceivable that a ZW system, with a highly divergent W chromosome that is not  
259 represented in the *P. trichocarpa* reference sequence [24], could produce the observed  
260 pattern of homozygosity in females and heterozygosity in males at SNPs significantly  
261 associated with sex, as the W sequence would be absent in males and divergent enough  
262 from the Z that reads from the W chromosome do not map to the reference sequence.  
263 Thus, in females, apparent homozygosity would in fact be due to hemizyosity. Several  
264 observations contradict this hypothesis: a) we observed heterozygous positions in females  
265 at sex-linked regions intermingled with SNPs significantly associated with sex (SI), b)  
266 Sanger sequencing of females for sex-linked regions revealed heterozygous positions  
267 (SI), c) qPCR of two sex-linked regions (Chr19P and Chr19D) revealed a 1:1 ratio of  
268 amplification of autosomal to sex-linked regions in both sexes (SI), d) WGS coverage is  
269 approximately similar in males and females at sex-linked regions (SI) and e) *de novo*  
270 assembly of female specific regions did not reveal unassembled regions unique to  
271 females (SI). Given strong direct evidence for an XY system from sex-linked markers,  
272 and absence of evidence for hemizyosity in females, we now argue that the ZW  
273 hypothesis can be discounted.

274

275 Genomic architecture of the sex locus

276           The 623 sex-specific SNP markers identified by GWAS in T52 are in nearly  
277 complete genetic linkage (Fig. S2). The majority of these markers map to Chr19P  
278 confirming previous studies that implicate this region as the location of the sex locus [16,  
279 17]. However, remarkably, we found that sex-linked markers in apparent genetic linkage  
280 map to multiple physical locations in the three *P. trichocarpa* genome assemblies (Fig. 1  
281 and Tables S2-S4). Our data do not support the existence of a multi-locus system of sex  
282 determination in *P. trichocarpa*, but instead suggest that a single genetic region controls  
283 dioecy and that the genome assembly is a work in progress with some contigs from  
284 Chr19P having been misassembled into other genomic regions. Sex determining regions  
285 and sex chromosomes are notoriously difficult to assemble [25]. Further refinement of  
286 the assembly regarding the sex locus may require complementary methods.

287

#### 288 The age of the cottonwood sex locus and evolution of dioecy in *Populus*

289           We find the same sex-linked markers in *P. trichocarpa* and *P. balsamifera*  
290 (*Populus* section Tacamahaca) as well as in *P. nigra* and *P. deltoides* (*Populus* section  
291 Aigeiros). The sex locus therefore predates the divergence of these species. Sequence  
292 analysis of sex regions of these species suggests an approximate date of 6-7 MYA (late  
293 Tertiary) for the divergence of X and Y. The fossil record indicates that aspens (*Populus*  
294 sect. *Populus*) likely diverged from cottonwoods long before this, given that middle to  
295 late Oligocene (~25 MYA) fossils of section *Populus* from Alaska have been reported  
296 [26]. Consistent with this is the fact that the polymorphic loci we identified do not  
297 provide sex-specific markers in aspens. Furthermore, sex linked markers have recently  
298 been identified in the pericentromeric region of Chr19 in aspens [22]. Genes in this

299 region are not homologous to sex-linked genes identified in our study, and SNPs in this  
300 region do not segregate with sex in our mapping populations (SI); hence aspens and  
301 cottonwoods likely have independent sex determining mechanisms.

302         If there were a single origin of dioecy in this group, it is problematic that there are  
303 apparently distinct sex-determining loci in *Populus*. One plausible explanation is that  
304 there has been at least one sex-determination mechanism “turnover” since the divergence  
305 of poplars and aspens. The labile nature of sex determining regions is well known, with  
306 many examples of "turnover" of sex determining regions from diverse groups [27].  
307 Mapping of sex-linked regions in other *Populus* species as well as in the sister genus  
308 *Salix* (willows) would provide further insight into the dynamics of sex-linked region  
309 turnover in the Salicaceae.

310

#### 311 The size of the sex locus

312         One remarkable feature of the sex locus described here is its compactness.  
313 Concatenating all the regions with sex specific markers leads to a total estimated size for  
314 the sex-determining region of ~100 Kbp. This small size is consistent with the difficulties  
315 encountered in finding sex-specific markers in the Salicaceae (reviewed in [15]).  
316 However, there are good reasons for supposing that a non-recombining region at a sex  
317 locus will rapidly expand, eventually to encompass an entire chromosome [28]. Such  
318 expansion is empirically well documented in other plant systems [29] and is driven by  
319 sexual conflict making it advantageous for more and more genes to be captured by the  
320 non-recombining regions. Even the 6-7 MYA date we estimate for the divergence of X  
321 and Y alleles would likely be sufficient for expansion to encompass a considerable

322 portion of a chromosome. Therefore the apparent remarkably small size of the *P.*  
323 *trichocarpa* sex locus requires explanation.

324 One possibility is that the actual size of the cottonwood sex-determining locus is  
325 larger than it appears due to large tandem duplications and transposable element  
326 insertions in the Y. Yet, our *de novo* assembly of male-specific unmapped reads revealed  
327 only four small male-specific contigs (average length 1877 bp, SI) and these have either  
328 Blast hits to the sex-linked regions identified with GWAS (SI) or consist mostly of low  
329 complexity repetitive sequence. We were unable to retrieve further male-specific contigs,  
330 specifically, regions of higher divergence to the female reference sequence that may be  
331 indicative of older divergence strata as observed in other animal [8] and plant species  
332 [29]. Future investigations might reveal larger Y-specific regions. Alternatively, it is  
333 possible that features unique to trees dampen the expansion of sex determining regions.  
334 For instance, sexual conflict may be minimal in trees as carbon investment in  
335 reproduction is a relatively small annual cost compared to the massive storage of carbon  
336 in wood, a tissue with no obvious secondary sexual characteristics.

337

### 338 Functional insights into sex-determination in cottonwoods

339 The sex-linked specific region in *P. trichocarpa* contains 13 genes (Table 2).  
340 However it is too early to say which, if any, of these genes are the master-regulators of  
341 sex. The reference genome is from a female (XX) individual [24] and, as suggested  
342 above, further work is required to fully characterize the Y chromosome. Furthermore,  
343 many of the genes in this region have poorly defined functions. Nevertheless, there are at  
344 least two plausible candidate genes. One, a poplar ortholog of the *Arabidopsis thaliana*

345 [Arabidopsis] cytokinin pathway-associated *ARABIDOPSIS RESPONSE REGULATOR*  
346 *17 (ARR17)*, is implicated in phytohormone signaling and the other, the poplar ortholog  
347 of Arabidopsis *METHYLTRANSFERASE 1, (MET1)*, is involved in DNA methylation.

348 Phytohormone signaling is involved in other plant sex determination systems,  
349 such as the ethylene pathway in cucumber [30], and it is possible that cytokinin  
350 signaling, mediated by *ARR17* is used in poplar. DNA methylation has been implicated in  
351 sex determination in other plant systems, e.g. *Silene latifolia* [31]. In an  
352 andromonoecious clone of *P. tomentosa* expression of the poplar orthologue of *MET1*  
353 was significantly higher in all stages of female flower development [32]. In Arabidopsis,  
354 *MET1* is required for maintenance of epigenetic memory [33] and is involved in  
355 reproductive development including the control of floral homeotic genes such as  
356 *AGAMOUS, APETALA3* and *SUPERMAN* [34, 35].

357 Due to the Salicoid WGD [24] there are two paralogs of genes in the sex locus  
358 region such as *ARR17* and *MET1*, relative to Arabidopsis. Neofunctionalization, in which  
359 one copy has evolved a specific sex-determining function while the other copy retains the  
360 ancestral function, is therefore possible. The WGD may thus be important in the  
361 evolution of dioecy in this group. Functional differences between the paralog in the sex-  
362 specific region and an autosomal sister paralog could reveal pathways involved in sex  
363 determination.

364

## 365 **Materials and Methods**

366 Tree sex was determined by visual inspection of flowers. DNA from *Populus*  
367 *trichocarpa* and *P. balsamifera* association populations was extracted from leaves and



368 sequenced (100bp paired-end reads) on an Illumina HiSeq at the Genome Sciences  
369 Centre, Vancouver, BC to either 15x or 30x coverage (SI). Sequence data generated  
370 ranged from 31-241 million reads. All sequences are deposited at the NCBI short read  
371 archive under SRA XXX. Illumina reads were aligned to reference *P. trichocarpa*  
372 genome assemblies v1.0, v2.2 and v3.0 (<http://www.phytozome.net>) using BWA version  
373 0.6.1 [36] with a 4 bp misalignment threshold, disallowing insertions or deletions within  
374 5bp of the end of the sequence (`aln -n 0.04 -i 5`), maximum insert size of 500 bp (`sampe -`  
375 `a 500`), and default values for the remaining parameters. Paired-end mate information was  
376 synced using Picard-tools FixMateInformation (<http://picard.sourceforge.net/>). Local re-  
377 alignment was performed on identified regions with high SNP entropy, using a window-  
378 size of 10 bp, and a mismatch fraction of 0.15 for base qualities to identify mismatched  
379 regions using GATK version 1.5 [36]. Indel re-alignments were restricted to regions  
380 with a maximum insert size of 3 Kbp, and the maximum positional change of an indel set  
381 to 200 bp. Variant calls were made using the duplicate-marked alignment files and the  
382 UnifiedGenotyper from GATK emitting variant with a minimum phred-scaled confidence  
383 threshold of 30. We used vcftools [37] to filter out any variants where coverage was <5X  
384 and where more than two bases were segregating.

385         We performed a standard case/control GWAS between allele frequencies and sex  
386 phenotype using Plink v1.07 [38]. We report associations at  $\alpha < 0.05$  after Bonferroni  
387 correction for multiple testing. Analysis of population structure in the three association  
388 populations is given in SI.

389         PCR-RFLP (polymerase chain reaction followed by restriction fragment length  
390 polymorphism) genotyping assays in two regions associated with sex were developed as

391 follows: mpileup files were converted into fasta files by generating calls at each base of  
392 the reference whenever coverage at the position in each individual was higher than six  
393 and whenever heterozygote genotypes were present by requiring that each allele had  
394 coverage of at least three. All other positions were considered missing data. The fasta  
395 sequences were used to design PCR primers in regions conserved across all accessions to  
396 amplify two short fragments on the sex-linked regions that mapped to Chr09 and Chr19P.  
397 PCR primers, amplicons and protocol details are in SI. The Chr09 amplicon was digested  
398 with *Bs**II* (New England Biolabs, Ipswich, MA) and *Cla**I* (New England Biolabs,  
399 Ipswich, MA); the Chr19 amplicon was digested with *Tsp**RI* (New England Biolabs,  
400 Ipswich, MA); see SI for details. The same assays were used in *P. deltooides*, *P. nigra* and  
401 *P. tremuloides* accessions (SI).

402 To generate haplotypic Sanger sequences from selected male accessions (SI),  
403 allele-specific primers [39] were designed for three regions of the gene  
404 POPTR\_0019s00240 on Chr19P and for one region of the gene POPTR\_0009s08410 on  
405 Chr09 (SI). Each allele-specific primer was used with the common primer to generate an  
406 allele-specific PCR fragment that was subsequently cloned and Sanger sequenced. PCR  
407 protocol, amplicon and cloning details are in SI. Chromatograms from Sanger sequencing  
408 were visually inspected, trimmed, and aligned with BioEdit [40]. Sequences were aligned  
409 to the closest *P. trichocarpa* paralog (resulting from the Salicoid WGD); for Chr09 the  
410 paralog is POPTR\_0001s29310, and for Chr19 the paralog is POPTR\_0004s14140) and  
411 neighbor joining maximum likelihood trees for each amplicon were estimated in MEGA  
412 v5.03 [41] using the Tamura-Nei model and complete deletion of all sites with missing  
413 data and gaps. Levels of divergence were calculated for synonymous sites ( $K_s$ ) only and

414 for replacement sites only ( $K_a$ ) in DNAsp v5 [42]. Sequence data is deposited in NCBI  
415 under accession numbers XXX.

416

## 417 **Acknowledgments**

418 This work was supported by the Genome Canada Large-Scale Applied Research Program  
419 (POPCAN, project 168BIO) to QCBC, CJD, RDG and SDM. Additional support was  
420 received from a NSERC (Canada) Discovery Grant to QCBC. We thank Dr. Michael  
421 Friedmann for assistance with project management, Drs. Steffi Fritsche and Daisie Huang  
422 for assistance and discussion, Drs. Loren Rieseberg and Sally Otto for comments on the  
423 manuscript; Dr. Barbara Thomas for aspen material and both POPCAN project personnel,  
424 AAFC staff and Rich Shuren who kindly helped in recording tree sex.

425

## 426 **References**

- 427 1. Jarne P, Auld JR (2006) Animals mix it up too: the distribution of self-fertilization  
428 among hermaphroditic animals. *Evolution* 60:1816–1824.
- 429 2. Renner SS, Ricklefs RE (1995) Dioecy and its correlates in the flowering plants.  
430 *American Journal of Botany* 596–606.
- 431 3. Charlesworth B (1991) The evolution of sex chromosomes. *Science* 251:1030–1033.
- 432 4. Bull JJ (1983) *Evolution of sex determining mechanisms*. Benjamin-Cummings  
433 Publishing Company.
- 434 5. Rice WR (1984) Sex chromosomes and the evolution of sexual dimorphism. *Evolution*  
435 38:735–742.
- 436 6. Bachtrog D (2013) Y-chromosome evolution: emerging insights into processes of Y-  
437 chromosome degeneration. *Nat Rev Genet* 14:113–124.
- 438 7. Graves JAM (2006) Sex chromosome specialization and degeneration in mammals.  
439 *Cell* 124:901–914.
- 440 8. Skaletsky H, Kuroda-Kawaguchi T, Minx PJ, et al. (2003) The male-specific region of

- 441 the human Y chromosome is a mosaic of discrete sequence classes. *Nature* 423:825–  
442 837.
- 443 9. Vicoso B, Emerson JJ, Zektser Y, et al. (2013) Comparative sex chromosome  
444 genomics in snakes: differentiation, evolutionary strata, and lack of global dosage  
445 compensation. *Plos Biol* 11:e1001643.
- 446 10. Yoshida K, Makino T, Yamaguchi K, et al. (2014) Sex chromosome turnover  
447 contributes to genomic divergence between incipient stickleback species. *PLoS*  
448 *Genet* 10:e1004223.
- 449 11. Ming R, Bendahmane A, Renner SS (2011) Sex chromosomes in land plants. *Annu*  
450 *Rev Plant Biol* 62:485–514
- 451 12. Zhang J, Boualem A, Bendahmane A, Ming R (2014) Genomics of sex determination.  
452 *Current Opinion in Plant Biology* 18:110–116.
- 453 13. Stettler RF (1971) Variation in sex expression of black cottonwood and related  
454 hybrids. *Silvae Genet* 20:42–46.
- 455 14. Cronk QCB (2005) Plant eco-devo: the potential of poplar as a model organism. *New*  
456 *Phytologist* 166:39–48.
- 457 15. Tuskan GA, DiFazio SP, Faivre-Rampant P, et al. (2012) The obscure events  
458 contributing to the evolution of an incipient sex chromosome in *Populus*: a  
459 retrospective working hypothesis. *Tree Genet Genomes* 8:559–571.
- 460 16. Yin T, DiFazio SP, Gunter LE, et al. (2008) Genome structure and emerging evidence  
461 of an incipient sex chromosome in *Populus*. *Genome Research* 18:422–430.
- 462 17. Gaudet M, Jorge V, Paolucci I, et al. (2008) Genetic linkage maps of *Populus nigra*  
463 L. including AFLPs, SSRs, SNPs, and sex trait. *Tree Genet Genomes* 4:25–36.
- 464 18. Pakull B, Groppe K, Meyer M, et al. (2009) Genetic linkage mapping in aspen  
465 (*Populus tremula* L. and *Populus tremuloides* Michx.). *Tree Genet Genomes* 5:505–  
466 515.
- 467 19. Paolucci I, Gaudet M, Jorge V, et al. (2010) Genetic linkage maps of *Populus alba* L.  
468 and comparative mapping analysis of sex determination across *Populus* species. *Tree*  
469 *Genet Genomes* 6:863–875.
- 470 20. Pakull B, Groppe K, Mecucci F, et al. (2011) Genetic mapping of linkage group XIX  
471 and identification of sex-linked SSR markers in a *Populus tremula* × *Populus*  
472 *tremuloides* cross. *Can J For Res* 41:245–253.
- 473 21. Kersten B, Pakull B, Groppe K, et al. (2014) The sex-linked region in *Populus*  
474 *tremuloides* Turesson 141 corresponds to a pericentromeric region of about two  
475 million base pairs on *P. trichocarpa* chromosome 19. *Plant Biol (Stuttg)* 16:411–418.

- 476 22. Pakull B, Kersten B, Lüneburg J, Fladung M (2014) A simple PCR-based marker to  
477 determine sex in aspen. *Plant Biol (Stuttg)*. doi: 10.1111/plb.12217
- 478 23. Rampant PF, Lesur I, Boussardon C, et al. (2011) Analysis of BAC end sequences in  
479 oak, a keystone forest tree species, providing insight into the composition of its  
480 genome. *BMC Genomics* 12:292.
- 481 24. Tuskan GA, DiFazio SP, Jansson S, et al. (2006) The genome of black cottonwood,  
482 *Populus trichocarpa* (Torr. & Gray). *Science* 313:1596–1604.
- 483 25. Li G, Davis BW, Raudsepp T, et al. (2013) Comparative analysis of mammalian Y  
484 chromosomes illuminates ancestral structure and lineage-specific evolution. *Genome*  
485 *Research* 23:1486–1495.
- 486 26. Wolfe JA, Tanai T (1980) The Miocene Seldovia Point Flora from the Kenai Group,  
487 Alaska. United States Government Printing Office, Washington DC.
- 488 27. Stöck M, Horn A, Grossen C, et al. (2011) Ever-young sex chromosomes in european  
489 tree frogs. *Plos Biol* 9:e1001062.
- 490 28. Charlesworth D (2013) Plant sex chromosome evolution. *Journal of Experimental*  
491 *Botany* 64:405–420.
- 492 29. Bergero R, Forrest A, Kamau E, Charlesworth D (2007) Evolutionary strata on the X  
493 chromosomes of the dioecious plant *Silene latifolia*: evidence from new sex-linked  
494 genes. *Genetics* 175:1945–1954.
- 495 30. Boualem A, Fergany M, Fernandez R, et al. (2008) A conserved mutation in an  
496 ethylene biosynthesis enzyme leads to andromonoecy in melons. *Science* 321:836–  
497 838.
- 498 31. Janousek B, Siroký J, Vyskot B (1996) Epigenetic control of sexual phenotype in a  
499 dioecious plant, *Melandrium album*. *Mol Gen Genet* 250:483–490.
- 500 32. Song Y, Ma K, Ci D, et al. (2013) Sexual dimorphic floral development in dioecious  
501 plants revealed by transcriptome, phytohormone, and DNA methylation analysis in  
502 *Populus tomentosa*. *Plant molecular biology* 83:559–576.
- 503 33. Blevins T, Pontvianne F, Cocklin R, et al. (2014) A two-step process for epigenetic  
504 inheritance in *Arabidopsis*. *Molecular Cell* 54:30–42.
- 505 34. Jacobsen SE, Sakai H, Finnegan EJ, et al. (2000) Ectopic hypermethylation of flower-  
506 specific genes in *Arabidopsis*. *Current Biology* 10:179–186.
- 507 35. Finnegan EJ, Peacock WJ, Dennis ES (1996) Reduced DNA methylation in  
508 *Arabidopsis thaliana* results in abnormal plant development. *Proc Natl Acad Sci USA*  
509 93:8449–8454.

- 510 36. Li H, Durbin R (2009) Fast and accurate short read alignment with Burrows-Wheeler  
511 transform. *Bioinformatics* 25:1754–1760.
- 512 37. DePristo MA, Banks E, Poplin R, et al. (2011) A framework for variation discovery  
513 and genotyping using next-generation DNA sequencing data. *Nat Genet* 43:491–498.
- 514 38. Danecek P, Auton A, Abecasis G, et al. (2011) The variant call format and VCFtools.  
515 *Bioinformatics* 27:2156–2158.
- 516 39. Purcell S, Neale B, Todd-Brown K, et al. (2007) PLINK: a tool set for whole-genome  
517 association and population-based linkage analyses. *The American Journal of Human*  
518 *Genetics* 81:559–575.
- 519 40. Ye S, Dhillon S, Ke XY, et al. (2001) An efficient procedure for genotyping single  
520 nucleotide polymorphisms. *Nucleic Acids Research* 29:art. no.–e88.
- 521 41. Hall TA (1999) BioEdit: a user friendly biological sequence alignment editor and  
522 analyses program for Windows 95/98/NT. *Nucleic Acids Symposium Series* 41:95–  
523 98.
- 524 42. Tamura K, Peterson D, Peterson N, et al. (2011) MEGA5: molecular evolutionary  
525 genetics analysis using maximum likelihood, evolutionary distance, and maximum  
526 parsimony methods. *Mol Biol Evol* 28:2731–2739.
- 527 43. Librado P, Rozas J (2009) DnaSP v5: a software for comprehensive analysis of DNA  
528 polymorphism data. *Bioinformatics* 25:1451–1452.

Table 1. Number of loci associated with sex (and percent observed genotypes) in T52 and BT68.

|       | T52  |           |       | BT68 |           |       |
|-------|------|-----------|-------|------|-----------|-------|
|       | Loci | Genotypes |       | Loci | Genotypes |       |
|       |      | Females   | Males |      | Females   | Males |
| Total | 623  | 20849     | 10796 | 303  | 10439     | 9220  |
| % YY  |      | 0.0       | 0.9   |      | 0.0       | 0.2   |
| % XY  |      | 0.1       | 94.0  |      | 0.4       | 94.1  |
| % XX  |      | 99.9      | 5.1   |      | 99.6      | 5.7   |

Table 2- All regions significantly associated with sex in T52 (v2.2 of the genome annotation).

| Chr <sup>1</sup> | Range <sup>2</sup> | Length (bp) <sup>3</sup> | T52 <sup>4</sup> | Genes v2.2 (POPTR_ <sub>5</sub> ) <sup>5</sup> | Arabidopsis ortholog <sup>6</sup> | Arabidopsis name or description [function]              |
|------------------|--------------------|--------------------------|------------------|------------------------------------------------|-----------------------------------|---------------------------------------------------------|
| 1                | 3391740..3395419   | 3680                     | 12               | 0001s04290                                     | AT4G25650                         | ACD1-LIKE [plastid function]                            |
| 4                | 15911439..15911672 | 234                      | 2                |                                                |                                   |                                                         |
| 5                | 4647049..4647851   | 803                      | 4                |                                                |                                   |                                                         |
| 8                | 5205..5205         | 1                        | 1                |                                                |                                   |                                                         |
| 9                | 7708230..7709240   | 1011                     | 36               | 0009s08410                                     | AT1G58290                         | ATHEMA1 [chlorophyll biosynthesis]                      |
| 19               | 4440..67615        | 63176                    | 387              | 0019s00210                                     | AT5G26360                         | TCP-1/cpn60 chaperonin family protein [protein folding] |
|                  |                    |                          |                  | 0019s00220                                     | AT5G49890                         | ATCLC-C; [transmembrane chloride transport]             |
|                  |                    |                          |                  | 0019s00230                                     | AT5G49890                         | ATCLC-C; [transmembrane chloride transport]             |
|                  |                    |                          |                  | 0019s00240                                     | AT5G49160                         | MET1; [cytosine methyltransferase]                      |
|                  |                    |                          |                  | 0019s00250                                     | AT1G12210                         | RFL1; [defense response]                                |
|                  |                    |                          |                  | 0019s00260                                     | AT5G47260                         | NB-ARC protein [defense response]                       |
| 19               | 15953054..15958519 | 5466                     | 91               | 0019s15410                                     | AT3G56380                         | ARR17; [cytokinin-mediated signaling pathway]           |
|                  |                    |                          |                  | 0019s15415                                     | AT1G11300                         | EGM1; [protein kinase]                                  |
| 261              | 160..24417         | 24258                    | 62               | 0261s00200                                     | AT5G26360                         | TCP-1/cpn60 chaperonin family protein [protein folding] |
|                  |                    |                          |                  | 0261s00210                                     | NA                                |                                                         |
|                  |                    |                          |                  | 0261s00220                                     | AT5G49890                         | ATCLC-C; [transmembrane chloride transport]             |
| 1817             | 162..561           | 400                      | 7                |                                                |                                   |                                                         |
| 2325             | 155..2156          | 2002                     | 21               |                                                |                                   |                                                         |

<sup>1</sup>Chromosome/scaffold. <sup>2</sup>Position of the first and last significant SNPs. <sup>3</sup>Distance in base pairs between the first and last significant SNPs. <sup>4</sup>Number of significant SNPs. <sup>5</sup>Arabidopsis ortholog retrieved from v2.2 annotation.



Table 3- Divergence estimates at two regions associated with sex.

|                  |                                             | XY <sup>2</sup>       |                  |                       | X <sup>3</sup>   |                       | Y <sup>4</sup>   |        |
|------------------|---------------------------------------------|-----------------------|------------------|-----------------------|------------------|-----------------------|------------------|--------|
| X-Y <sup>1</sup> |                                             | <i>P. tremuloides</i> | Salicoid Paralog | <i>P. tremuloides</i> | Salicoid Paralog | <i>P. tremuloides</i> | Salicoid Paralog |        |
| Chr09            | K <sub>s</sub> <sup>5</sup>                 | 0.0224                | 0.0638           | 0.2027                | 0.0547           | 0.2174                | 0.0683           | 0.1889 |
|                  | K <sub>a</sub> /K <sub>s</sub> <sup>6</sup> | 1.606                 | 0.761            | 0.667                 | 0.56             | 0.582                 | 0.87             | 0.737  |
| Chr19            | K <sub>s</sub> <sup>5</sup>                 | 0.0163                | 0.0186           | 0.1774                | 0.0227           | 0.182                 | 0.0144           | 0.1728 |
|                  | K <sub>a</sub> /K <sub>s</sub> <sup>6</sup> | 0.295                 | 0.331            | 0.198                 | 0.247            | 0.188                 | 0.463            | 0.208  |

<sup>1</sup>Divergence between the X and Y clades from Fig. 2. <sup>2</sup>Divergence between all cottonwood sequences and *P. tremuloides*/Salicoid paralog. <sup>3</sup>Divergence between all sequences from the X lineage in cottonwoods and *P. tremuloides*/Salicoid paralog. <sup>4</sup>Divergence between all sequences from the Y lineage in cottonwoods and *P. tremuloides*/Salicoid paralog. <sup>5</sup>Synonymous substitutions at synonymous sites included in the estimation of K. <sup>6</sup>The ratio of non-synonymous substitutions per non-synonymous site to synonymous substitutions per synonymous site.

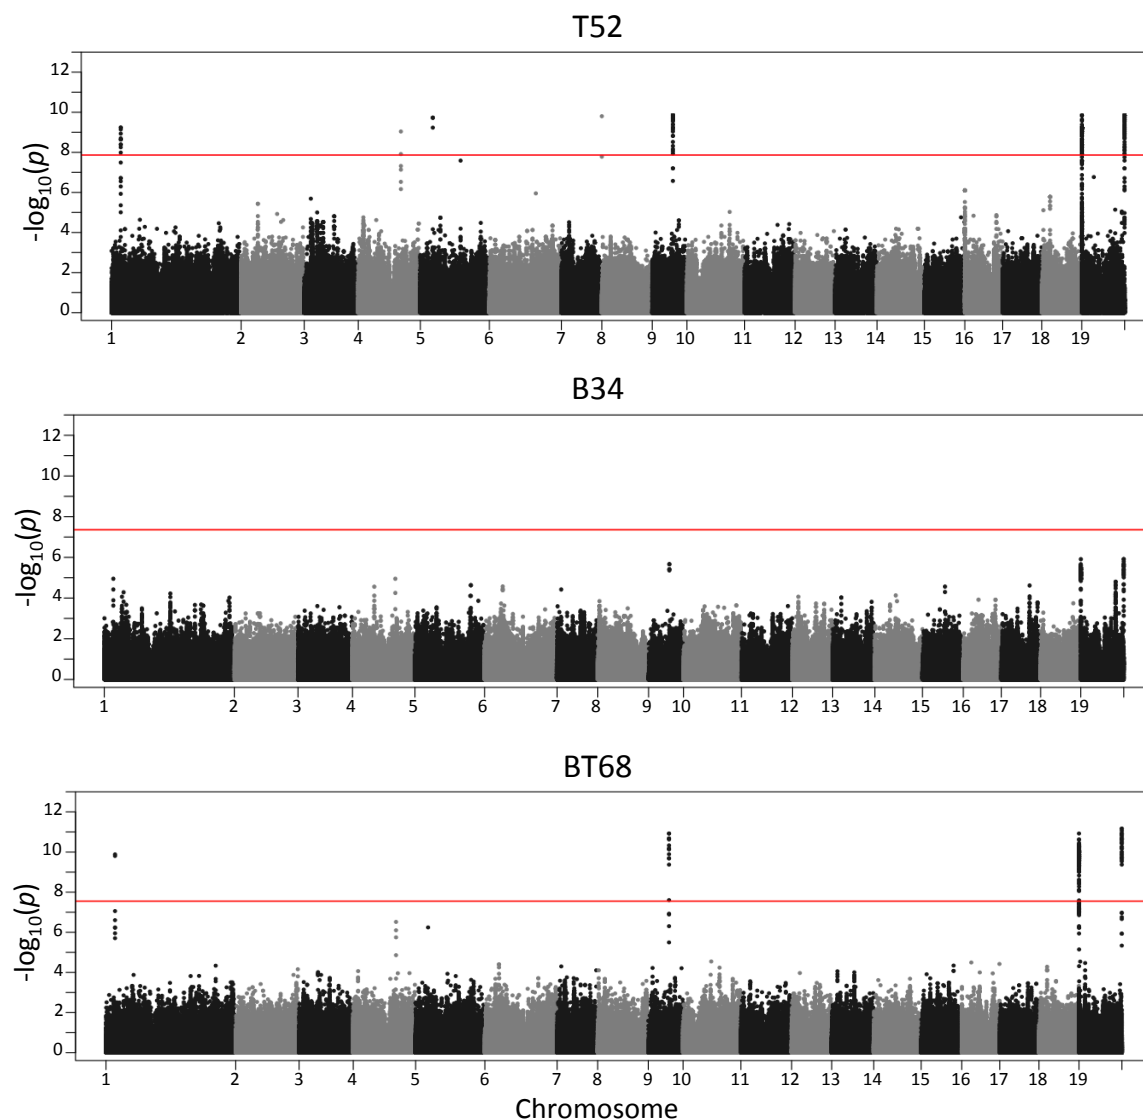

Fig. 1- Manhattan plots depicting the GWAS results for association between allele frequency (v2.2 of the reference genome) and sex in three populations: 34 female and 18 male *P. trichocarpa* accessions (T52), 18 female and 16 male *P. balsamifera* accessions (B34) and 36 female and 32 male accessions, where half the samples of each sex are *P. trichocarpa* and the other half are *P. balsamifera* (BT68). SNPs mapped to unassembled scaffolds are not represented. The horizontal line indicates the  $-\log_{10}(p)$  value corresponding to  $\alpha < 0.05$  after Bonferroni correction for multiple testing.

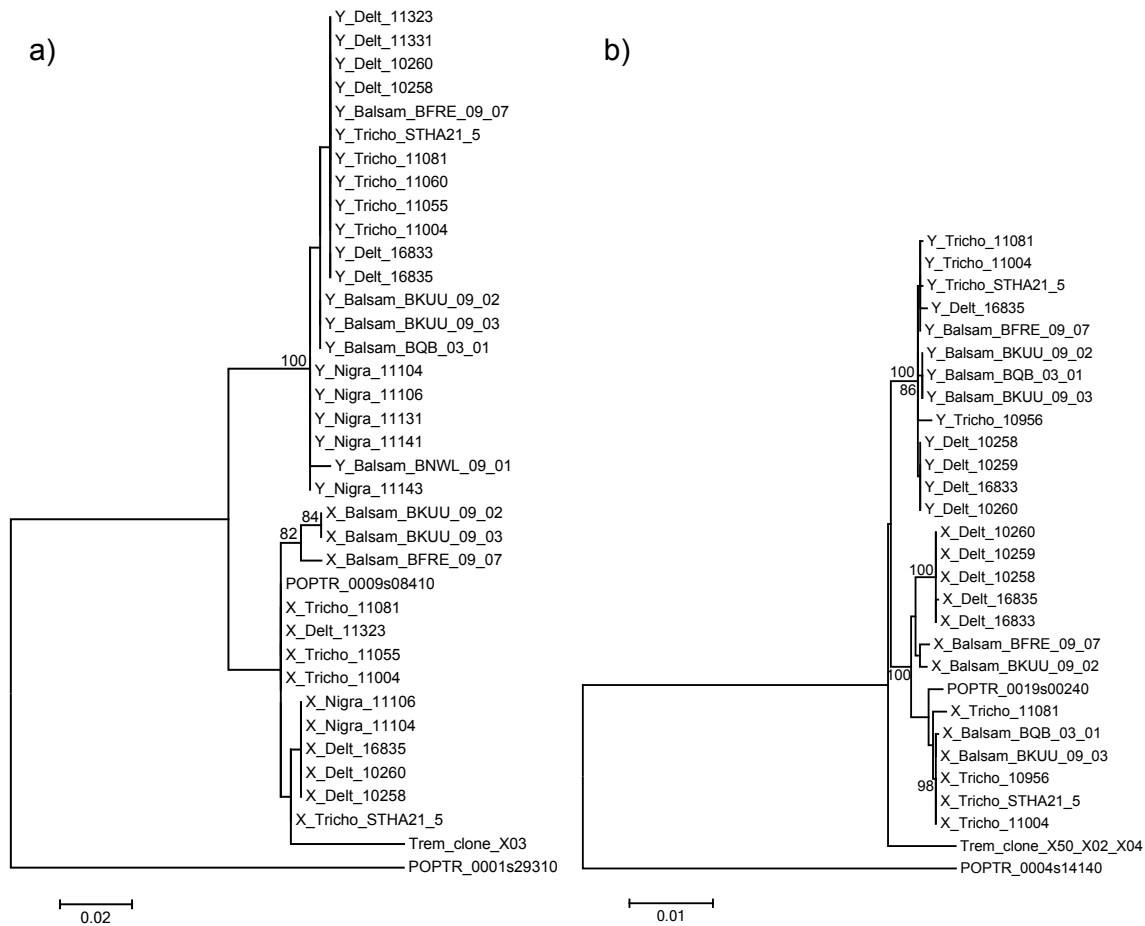

Fig. 2- Neighbor joining maximum likelihood phylogenies of regions significantly associated with sex. For each phylogeny, only male accessions were used. Y chromosome alleles are indicated with a Y and X chromosome alleles with an X at the beginning of the sequence name, followed by species and accession identifiers. Only one random *P. tremuloides* allele is depicted. Phylogenies including all *P. tremuloides* sequences are available in Fig. S5. Each phylogeny also includes the *P. trichocarpa* reference sequence from genome assembly v2.2 (POPTR\_0009s08410 and POPTR\_00019s00240) and the reference sequence from genome assembly v2.2 of the paralog from the Salicoid WGD (POPTR\_0001s29310 and POPTR\_0004s14140). Only bootstrap values higher than 80 are shown. a) Phylogeny of Chr09 region (Amplicon1:Chr09:7690067, SI) and b) Concatenated phylogeny of Chr19 (Amplicon1:Chr19:40024, Amplicon2:Chr19:41515 and Amplicon3:Chr19:44107, SI).
